# Supplementary material
Source: Springer Nature journal article supplement (https://www.springermedizin.de/resource/supplementary/12974_2010_247_MOESM4_ESM.pdf/9601092)

Luciferin intensity  
(% of control)

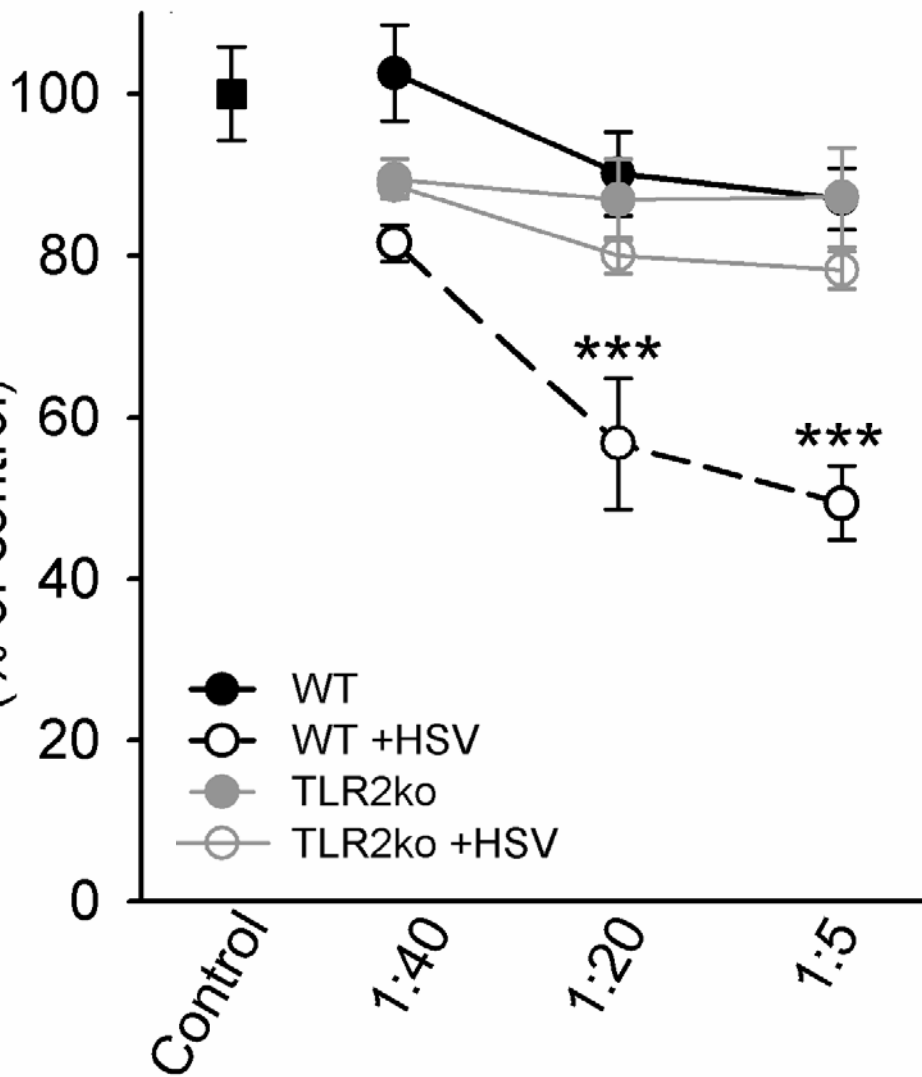

Supplement: MOESM4 [file 9601092]
